# Supplementary material
Source: Hindawi journal article supplement (doi:10.1155/2011/673752)
Supplement: f1 [file 673752.f1.pdf]

# Experimental Design of Experiment I:

**Day 0**  
(CD34<sup>+</sup> selection)

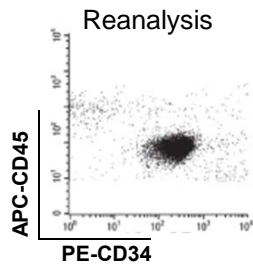

**HEMA**

**Day 11**  
(CFSE labeling)

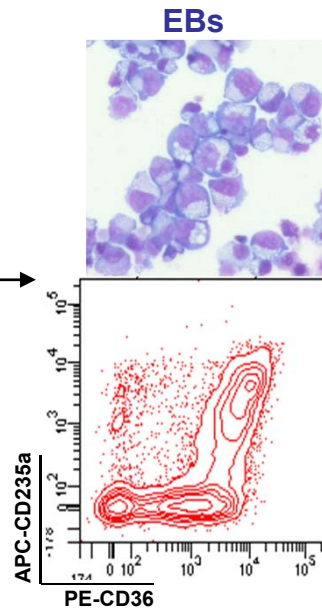

**Day 12**

Phlebotomized  
NOD/SCID/IL2R $\gamma$ <sup>null</sup> mice

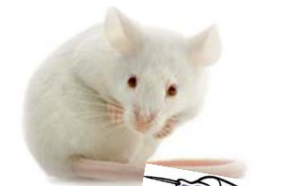

**25x10<sup>6</sup> EBs  
Injection**

**Day 16**

**Sacrifice  
and FACS  
analyses**

Supplemental Figure 1
