# Supplementary material
Source: Hindawi journal article supplement (doi:10.1155/2011/673752)
Supplement: f3 [file 673752.f3.pdf]

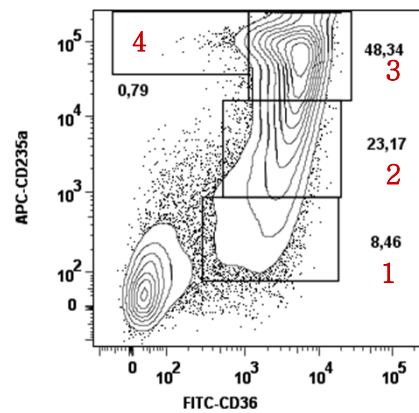

- 1: Class 1, CD36<sup>high</sup>CD235a<sup>neg</sup> (CFU-E and pro-erythroblasts)
- 2: Class 2, CD36<sup>high</sup>CD235a<sup>low</sup> (pro-erythroblasts)
- 3: Class 3, CD36<sup>high</sup>CD235a<sup>high</sup> (basophilic-polychromatic erythroblast)
- 4: Class 4, CD36<sup>low</sup>CD235a<sup>high</sup> (orthochromatic erythroblasts)

Supplemental Figure 3A

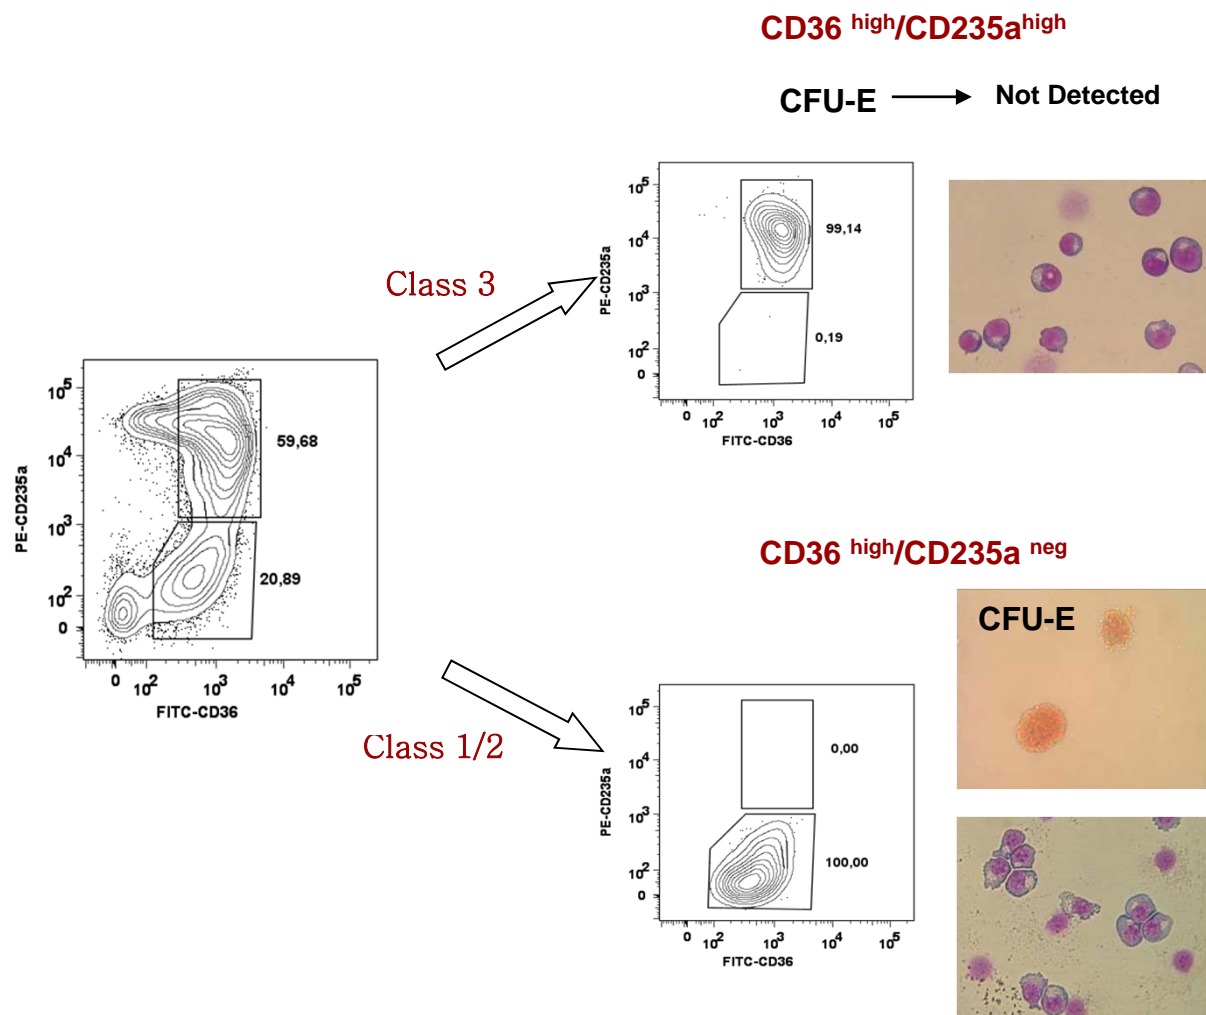

Supplemental Figure 3B
