# Supplementary material
Source: Hindawi journal article supplement (doi:10.1155/2011/673752)

## Experimental Design of Experiment II:

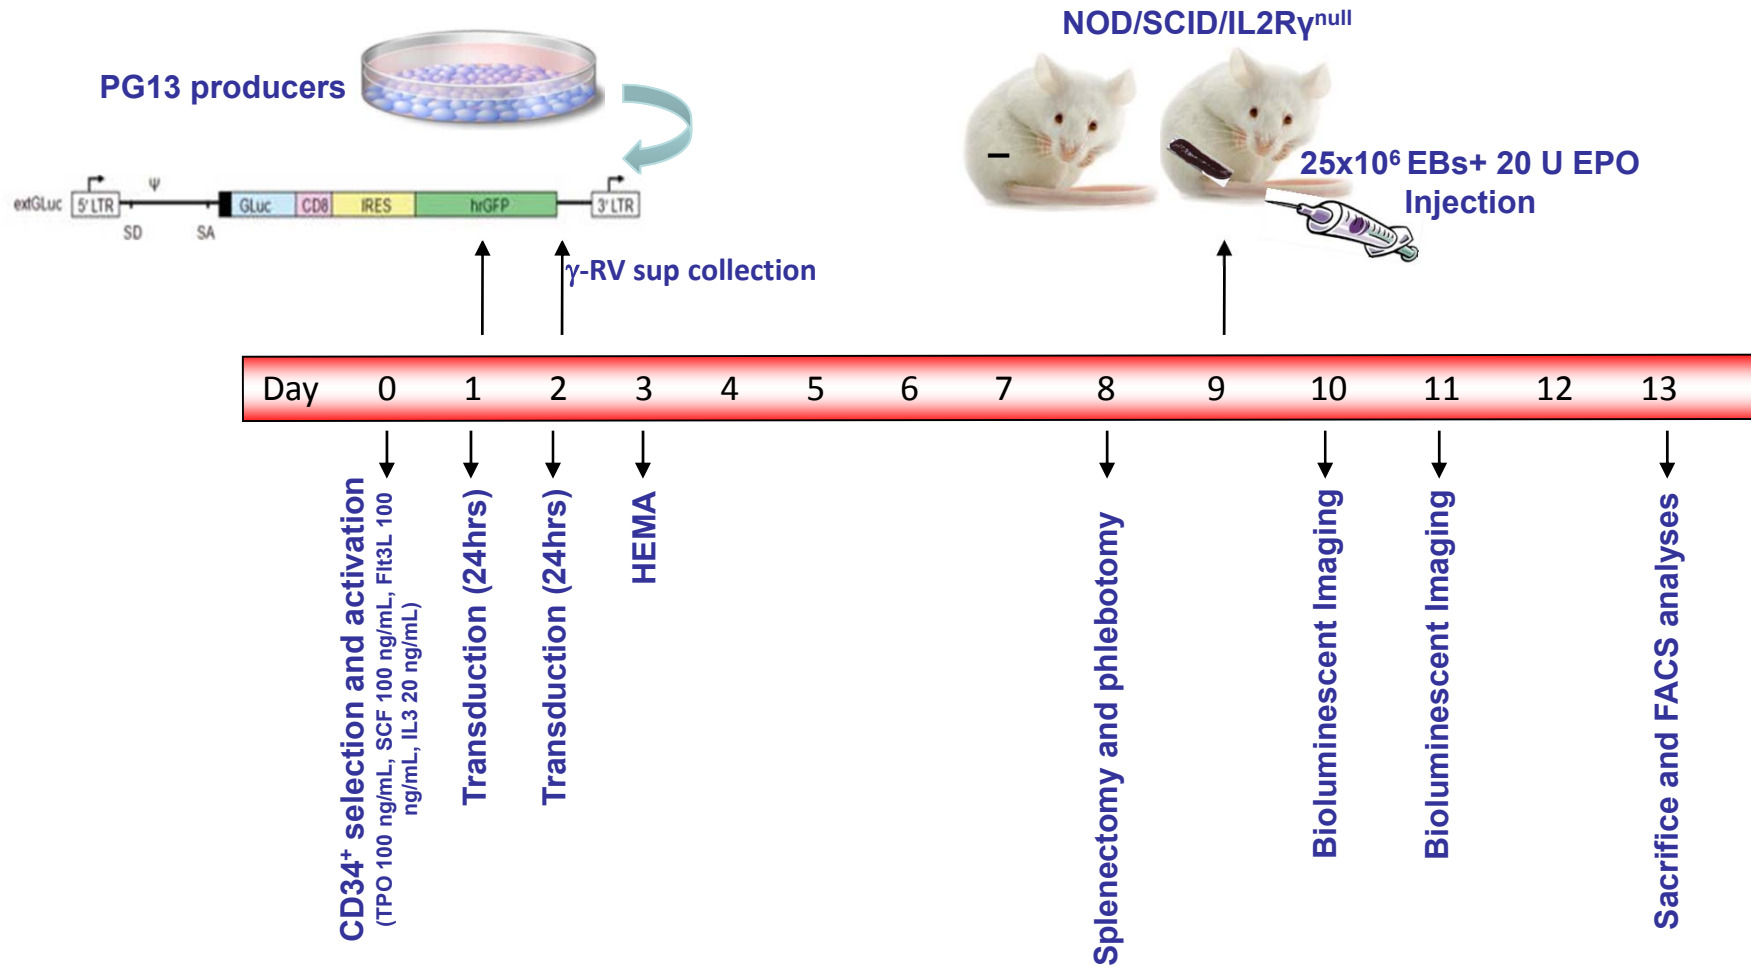

Supplemental Figure 2

Supplement: f2 [file 673752.f2.pdf]
